# Supplementary material for: Clinical Characteristics and Prognosis of Patients with Multi-Vessel Coronary Spasm in Comparison with Those in Patients with Single-Vessel Coronary Spasm
Source: MDPI journal article supplement (doi:10.3390/jcdd9070204), 2022-06-28
Supplement: s1 [file s1]

**Table S1.** Abbreviation list.

|        |                                           |
|--------|-------------------------------------------|
| ACh    | acetylcholine                             |
| BNP    | brain natriuretic peptide                 |
| CAG    | coronary angiography                      |
| CCB    | calcium-channel blockers                  |
| CKD    | chronic kidney disease                    |
| CRP    | C-reactive protein                        |
| DM     | diabetes mellitus                         |
| ECG    | electrocardiogram                         |
| eGFR   | estimated glomerular filtration rate      |
| FBS    | fasting blood sugar                       |
| FH-CAD | family history of coronary artery disease |
| FMD    | flow-mediated dilation                    |
| HDL    | high-density lipoprotein                  |
| HgA1c  | Haemoglobin A1c                           |
| L-ACh  | a low dose of acetylcholine               |
| LAD    | left anterior descending coronary artery  |
| LCA    | left coronary artery                      |
| LCX    | left circumflex coronary artery           |
| LDL    | low-density lipoprotein                   |
| LVEF   | left ventricular ejection fraction        |
| MACE   | major cardiovascular events               |
| MVS    | multi-vessel spasm                        |
| NID    | nitroglycerin-induced dilation            |
| NTG    | nitroglycerin                             |
| RCA    | right coronary artery                     |
| SD     | standard deviation                        |
| SPT    | spasm provocation test                    |
| SVS    | single-vessel spasm                       |
| TOC    | total occlusion due to coronary spasm     |
| VA     | variant angina                            |
| VSA    | vasospastic angina                        |
| 2-VS   | two-vessel spasm                          |
| 3-VS   | three-vessel spasm                        |
